# Supplementary material
Source: Springer Nature journal article supplement (https://www.springermedizin.de/resource/supplementary/12916_2010_300_MOESM1_ESM.pdf/9599586)
Supplement: MOESM1 [file 9599586]

**Genetics**

**Lifestyle/obesity**

**Hormonal changes**

**Androgens**

**Insulin**

Ovarian follicles/  
anovulation/estrogen

Diabetes

Hirsutism/  
acne

Menstrual  
disturbances

Cardiovascular  
risk/metabolic  
syndrome

Psychosocial issues: body image, self esteem, depression, anxiety
